# Supplementary material
Source: ML conference proceedings conference paper supplement (https://aclanthology.org/2021.acl-srw.25)
Supplement: OptionalSupplementaryMaterial [file ACL_IJCNLP_2021_Proceedings___Appendix.pdf › ACL_IJCNLP_2021_Proceedings___Appendix.pdf]

| Method      | Input Embedding Type<br>Vocabulary | Our Approach |       |        |       | SMS    |       |
|-------------|------------------------------------|--------------|-------|--------|-------|--------|-------|
|             |                                    | Dense        |       | Sparse |       | Sparse |       |
|             |                                    | C            | U     | C      | U     | C      | U     |
| SensEval2   |                                    |              |       |        |       |        |       |
| BERT        | Base                               | 67.17        | 65.95 | 70.90  | 69.85 | 67.79  | 65.60 |
|             | Large                              | 66.69        | 66.03 | 68.71  | 66.82 | 63.49  | 60.07 |
| SenseBERT   | Base                               | –            | 72.21 | –      | 78.26 | –      | 77.16 |
|             | Large                              | –            | 68.93 | –      | 76.95 | –      | 76.42 |
| DistilBERT  | Base                               | 66.30        | 68.40 | 72.69  | 73.04 | 69.32  | 70.24 |
| RoBERTa     | Base                               | 62.66        | –     | 67.48  | –     | 63.23  | –     |
|             | Large                              | 67.96        | –     | 72.34  | –     | 68.53  | –     |
| XLM-RoBERTa | Base                               | 66.30        | –     | 71.16  | –     | 69.69  | –     |
|             | Large                              | 65.81        | –     | 69.98  | –     | 65.24  | –     |

Table 1: Accuracy of each model on the supersense prediction task using dense and sparse embedding spaces. All of the sparse representations were generated using  $\lambda = 0.1$  for the regularization coefficient and  $k = 3000$  basis based on the experiments reported. C and U stands for the utilized vocabulary being Cased and Uncased, respectively.

| Method               |            | Our Approach |       |        |       | SMS    |       |
|----------------------|------------|--------------|-------|--------|-------|--------|-------|
| Input Embedding Type | Vocabulary | Dense        |       | Sparse |       | Sparse |       |
|                      |            | C            | U     | C      | U     | C      | U     |
| SensEval3            |            |              |       |        |       |        |       |
| BERT                 | Base       | 64.70        | 62.05 | 70.32  | 69.51 | 64.81  | 62.05 |
|                      | Large      | 64.21        | 62.16 | 70.21  | 66.32 | 63.49  | 56.81 |
| SenseBERT            | Base       | –            | 63.56 | –      | 74.75 | –      | 71.45 |
|                      | Large      | –            | 62.91 | –      | 74.91 | –      | 70.86 |
| DistilBERT           | Base       | 62.16        | 64.10 | 72.59  | 74.27 | 66.70  | 67.45 |
| RoBERTa              | Base       | 59.02        | –     | 66.16  | –     | 61.40  | –     |
|                      | Large      | 64.00        | –     | 70.00  | –     | 65.02  | –     |
| XLM-RoBERTa          | Base       | 62.27        | –     | 70.59  | –     | 67.29  | –     |
|                      | Large      | 61.67        | –     | 67.67  | –     | 64.75  | –     |

Table 2: Accuracy of each model on the supersense prediction task using dense and sparse embedding spaces. All of the sparse representations were generated using  $\lambda = 0.1$  for the regularization coefficient and  $k = 3000$  basis based on the experiments reported. C and U stands for the utilized vocabulary being Cased and Uncased, respectively.

| Method      | Input Embedding Type | Vocabulary | Our Approach |       |        |       | SMS    |       |
|-------------|----------------------|------------|--------------|-------|--------|-------|--------|-------|
|             |                      |            | Dense        |       | Sparse |       | Sparse |       |
|             |                      |            | C            | U     | C      | U     | C      | U     |
| SemEval2007 |                      |            |              |       |        |       |        |       |
| BERT        | Base                 |            | 59.78        | 58.24 | 65.93  | 64.61 | 62.41  | 61.53 |
|             | Large                |            | 58.46        | 57.14 | 62.85  | 61.09 | 58.24  | 56.70 |
| SenseBERT   | Base                 |            | –            | 61.09 | –      | 71.42 | –      | 67.25 |
|             | Large                |            | –            | 61.75 | –      | 71.42 | –      | 67.25 |
| DistilBERT  | Base                 |            | 58.24        | 55.38 | 65.93  | 68.79 | 61.31  | 62.63 |
| RoBERTa     | Base                 |            | 52.96        | –     | 58.90  | –     | 53.18  | –     |
|             | Large                |            | 59.12        | –     | 62.41  | –     | 57.58  | –     |
| XLM-RoBERTa | Base                 |            | 58.68        | –     | 62.19  | –     | 61.31  | –     |
|             | Large                |            | 58.02        | –     | 59.78  | –     | 57.14  | –     |

Table 3: Accuracy of each model on the supersense prediction task using dense and sparse embedding spaces. All of the sparse representations were generated using  $\lambda = 0.1$  for the regularization coefficient and  $k = 3000$  basis based on the experiments reported. C and U stands for the utilized vocabulary being Cased and Uncased, respectively.

| Method      | Input Embedding Type | Vocabulary | Our Approach |       |        |       | SMS    |   |
|-------------|----------------------|------------|--------------|-------|--------|-------|--------|---|
|             |                      |            | Dense        |       | Sparse |       | Sparse |   |
|             |                      |            | C            | U     | C      | U     | C      | U |
| SemEval2013 |                      |            |              |       |        |       |        |   |
| BERT        | Base                 | 63.97      | 59.73        | 67.45 | 67.57  | 64.05 | 62.83  |   |
|             | Large                | 60.27      | 60.94        | 67.21 | 60.58  | 59.42 | 53.83  |   |
| SenseBERT   | Base                 | –          | 63.38        | –     | 69.46  | –     | 72.68  |   |
|             | Large                | –          | 62.83        | –     | 70.86  | –     | 72.56  |   |
| DistilBERT  | Base                 | 60.94      | 59.91        | 67.21 | 69.03  | 63.07 | 65.57  |   |
| RoBERTa     | Base                 | 56.56      | –            | 62.04 | –      | 63.30 | –      |   |
|             | Large                | 61.31      | –            | 67.45 | –      | 63.64 | –      |   |
| XLM-RoBERTa | Base                 | 60.03      | –            | 69.16 | –      | 61.31 | –      |   |
|             | Large                | 58.69      | –            | 66.78 | –      | 63.80 | –      |   |

Table 4: Accuracy of each model on the supersense prediction task using dense and sparse embedding spaces. All of the sparse representations were generated using  $\lambda = 0.1$  for the regularization coefficient and  $k = 3000$  basis based on the experiments reported. C and U stands for the utilized vocabulary being Cased and Uncased, respectively.

| Method      | Input Embedding Type<br>Vocabulary | Our Approach |       |        |       | SMS    |       |
|-------------|------------------------------------|--------------|-------|--------|-------|--------|-------|
|             |                                    | Dense        |       | Sparse |       | Sparse |       |
|             |                                    | C            | U     | C      | U     | C      | U     |
| SemEval2015 |                                    |              |       |        |       |        |       |
| BERT        | Base                               | 62.72        | 59.98 | 68.39  | 64.67 | 62.23  | 59.17 |
|             | Large                              | 61.44        | 58.86 | 66.43  | 64.48 | 59.39  | 55.77 |
| SenseBERT   | Base                               | –            | 61.64 | –      | 74.36 | –      | 75.04 |
|             | Large                              | –            | 60.95 | –      | 74.46 | –      | 74.95 |
| DistilBERT  | Base                               | 60.07        | 63.50 | 68.98  | 74.85 | 64.09  | 68.10 |
| RoBERTa     | Base                               | 57.82        | –     | 64.77  | –     | 63.30  | –     |
|             | Large                              | 62.32        | –     | 70.64  | –     | 65.08  | –     |
| XLM-RoBERTa | Base                               | 63.79        | –     | 68.39  | –     | 65.94  | –     |
|             | Large                              | 60.07        | –     | 64.72  | –     | 64.38  | –     |

Table 5: Accuracy of each model on the supersense prediction task using dense and sparse embedding spaces. All of the sparse representations were generated using  $\lambda = 0.1$  for the regularization coefficient and  $k = 3000$  basis based on the experiments reported. C and U stands for the utilized vocabulary being Cased and Uncased, respectively.
